# Supplementary material for: flat10MIP: An emissions-driven experiment to diagnose the climate response to positive, zero, and negative CO2 emissions
Source: Copernicus journal article supplement (doi:10.5194/egusphere-2024-3356), 2024-11-15

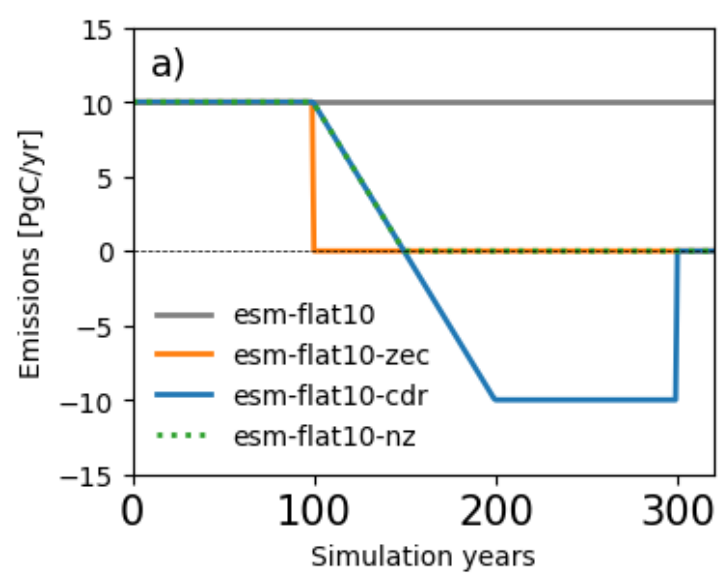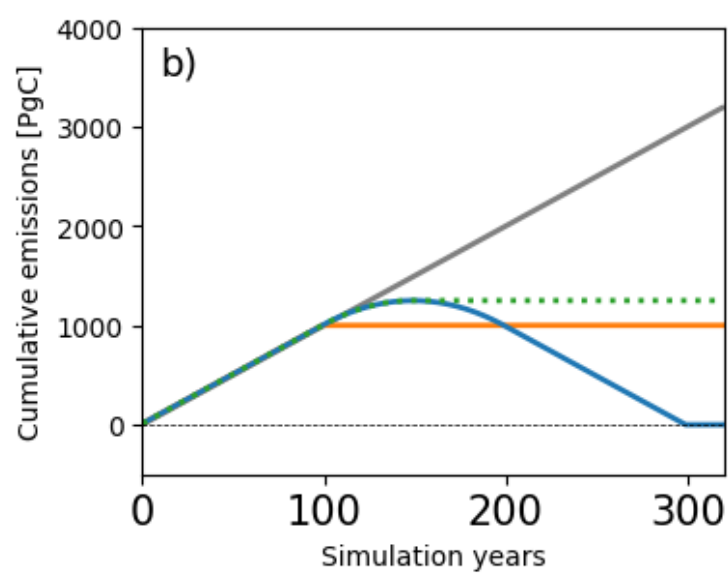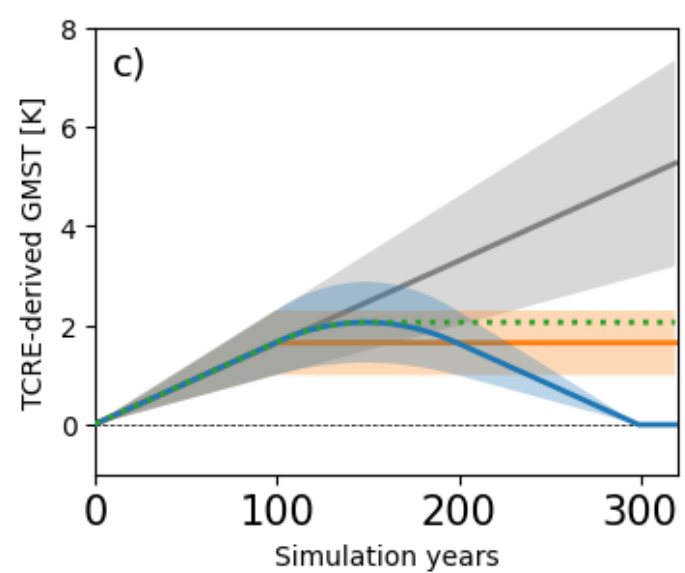

Supplement: Supplementary file [file egusphere-2024-3356-AC1-supplement.pdf]
